# Supplementary material for: The position effect of an ethynyl spacer on the carrier mobility of anthracene derivatives
Source: Royal Society of Chemistry journal article supplement (doi:10.1039/c5tc00606f), 2015-01-01

# Position Effect of Ethynyl Spacer on Carrier Mobility of Anthracene Derivatives

Xiaotao Zhang,<sup>a</sup> Guangyao Zhao,<sup>a</sup> Yonggang Zhen,<sup>\*a</sup> Zeyi Tu,<sup>a</sup> Ping He,<sup>a</sup> Yuanping Yi,<sup>a</sup> Huanli Dong<sup>a</sup> and Wenping Hu<sup>\*ab</sup>

<sup>a</sup>Beijing National Laboratory for Molecular Sciences, Key Laboratory of Organic Solids, Institute of Chemistry, Chinese Academy of Sciences, Beijing 100190, China

<sup>b</sup>Collaborative Innovation Center of Chemical Science and Engineering (Tianjin) & Department of Chemistry, School of Science, Tianjin University, Tianjin 300072, China

Correspondence: [zhenyg@iccas.ac.cn](mailto:zhenyg@iccas.ac.cn); [huwp@iccas.ac.cn](mailto:huwp@iccas.ac.cn)

## Table of contents

|                                                                                                       |    |
|-------------------------------------------------------------------------------------------------------|----|
| Experimental Section.                                                                                 | S2 |
| Fig. S1. HOMO and LUMO of <b>4</b> and <b>5</b> calculated at the B3LYP/6-31G(d) level.               | S3 |
| Fig. S2 TGA curves of compounds <b>4</b> , <b>5</b>                                                   | S3 |
| Fig. S3 The configuration and twist angle of <b>4</b> and <b>5</b>                                    | S3 |
| Table S1 Single crystal diffraction data and structure refinement for compounds <b>4</b> and <b>5</b> | S4 |
| Fig. S4 Crystal structures of compounds <b>4</b> and <b>5</b>                                         | S5 |
| Table S2 Hole and electron transfer integrals of compounds <b>4</b> and <b>5</b> .                    | S5 |
| Fig. S5 The molecules of compound <b>4</b> were perpendicular to the substrate.                       | S6 |
| Fig. S6 Optical images and XRD of thin film of <b>5</b> on OTS treated Si/SiO <sub>2</sub> substrate  | S7 |
| Fig. S7 Optical images of thin film of <b>4</b> and <b>5</b> on bare Si/SiO <sub>2</sub> substrate    | S7 |
| Fig. S6 NMR spectra of the compounds <b>4</b> and <b>5</b>                                            | S8 |

## Experimental Section

### Materials and Instrumentations

All reagents were used as received from commercial resources unless otherwise specified.

$^1\text{H}$  and  $^{13}\text{C}$  NMR spectra were recorded using a Bruker ADVANCE 400 NMR Spectrometer.  $^1\text{H}$  NMR spectra were referenced to  $\text{CDCl}_3$  (7.26 ppm) and  $\text{CH}_2\text{Cl}_2$  (5.33 ppm). UV-vis absorption spectra were measured with Hitachi (model U-3010) UV-Vis spectrophotometer in a 1-cm quartz cell. Photoluminescence (PL) spectra were recorded on a Perkin-Elmer LS 55 spectrofluorometer. In this experimental setup, it is possible to measure the X-ray diffraction intensity data were collected at 173 K on a Saturn724 + CCD diffractometer with graphite monochromated  $\text{Mo K}\alpha$  radiation. And the structure and refinement were carried out using the Crystal Clear (Rigaku Inc., 2008).

### Synthesis of compounds 4 and 5

**Compound 4:** A 100 mL flask was charged with 2-bromoanthracene (1.80 g, 7mmol), copper iodide (115 mg, 0.6 mmol),  $\text{Pd}(\text{PPh}_3)_2\text{Cl}_2$  (210 mg, 0.3 mmol), aqueous 2-aminoethanol (2 M, 20 mL), and THF (40 mL) under Ar. After the reaction mixture was degassed three times, 2-naphthylacetylene (1.52 g, 10 mmol) was added. The reaction solution was stirred overnight at 80 °C under Ar atmosphere. The aqueous layer was extracted with dichloromethane. The combined organic layer was evaporated under reduced pressure. The crude mixture was purified by recrystallization from toluene to provide compound **4** as yellow power (yield: 1.64 g, 71%).  $^1\text{H}$  NMR (400 MHz,  $\text{CD}_2\text{C}_2$ )  $\delta$  (ppm):  $\delta$ 9.09 (s, 1H), 8.53 (s, 1H), 8.28 (s, 1H), 8.21 – 8.15 (m, 1H), 8.08 (d,  $J$  = 8.6 Hz, 2H), 7.97 – 7.88 (m, 3H), 7.86 (dd,  $J$  = 6.9, 1.0 Hz, 1H), 7.80 (dd,  $J$  = 8.5, 1.6 Hz, 1H), 7.59 – 7.47 (m, 5H). HR-MS (EI) for  $\text{C}_{26}\text{H}_{16}$ : Calculated: 328.1252; Found: 328.1450.

**Compound 5:** A 100 mL flask was charged with 1-bromoanthracene (1.80 g, 7mmol), copper iodide (115 mg, 0.6 mmol),  $\text{Pd}(\text{PPh}_3)_2\text{Cl}_2$  (210 mg, 0.3 mmol), aqueous 2-aminoethanol (2 M, 20 mL), and THF (40 mL) under Ar. After the reaction mixture was degassed three times, 2-naphthylacetylene (1.52 g, 10 mmol) was added. The reaction solution was stirred overnight at 80 °C under Ar atmosphere. The aqueous layer was extracted with dichloromethane. The combined organic layer was evaporated under reduced pressure. The crude mixture was purified by recrystallization from toluene to provide compound **4** as yellow power (yield: 1.49 g, 65%).  $^1\text{H}$  NMR (400 MHz,  $\text{CDCl}_3$ )  $\delta$ 8.42 (s, 2H), 8.28 (s, 1H), 8.13 (s, 1H), 8.00 (d,  $J$  = 8.8 Hz, 3H), 7.85 (d,  $J$  = 8.3 Hz, 3H), 7.65 (d,  $J$  = 8.7 Hz, 1H), 7.58 (d,  $J$  = 8.8 Hz, 1H), 7.53 – 7.47 (m, 4H). HR-MS (EI) for  $\text{C}_{26}\text{H}_{16}$ : Calculated: 328.1252; Found: 328.1053.

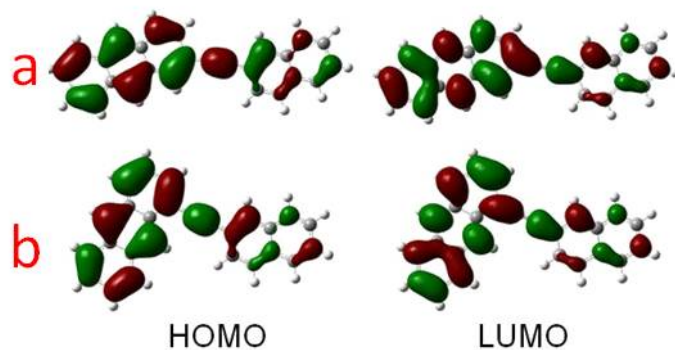

**Fig. S1** HOMO and LUMO of **4** (a) and **5** (b) calculated at the B3LYP/6-31G(d) level.

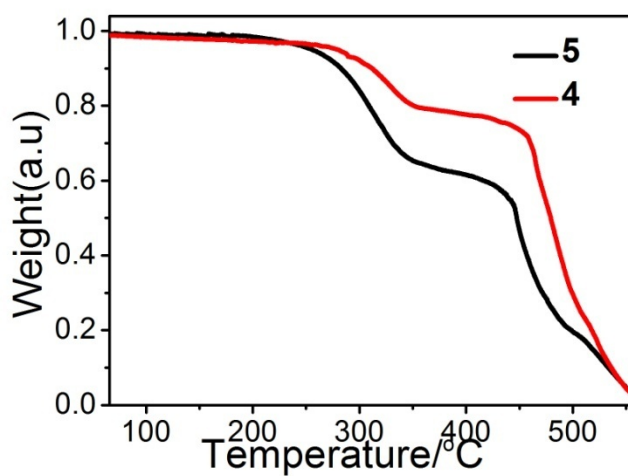

**Fig. S2.** TGA curves of compounds **4** and **5**, measured with a heating rate of 10 °C /min in nitrogen.

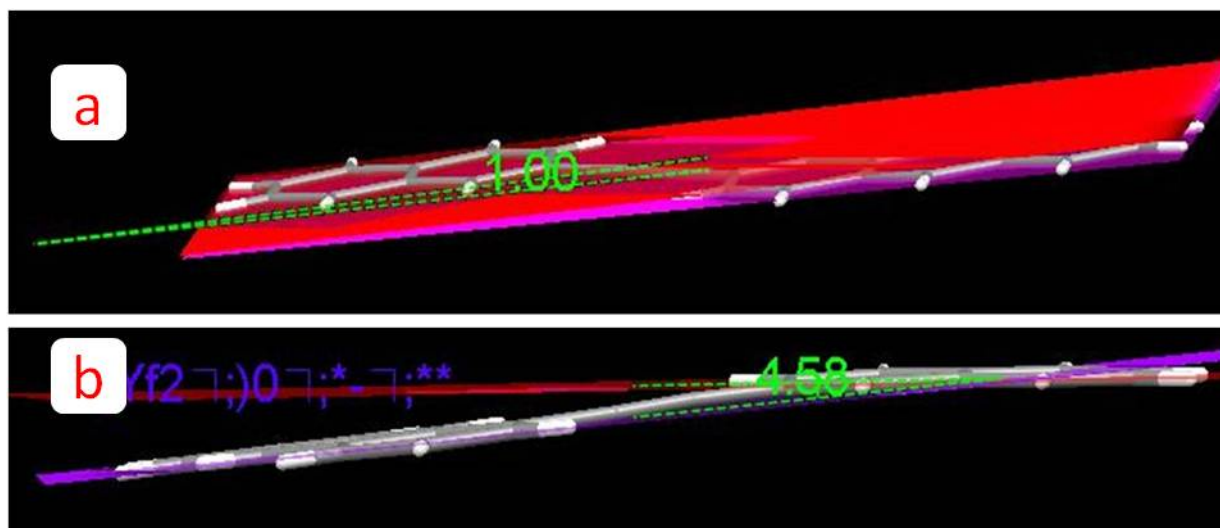

**Fig. S3** The configuration and twist angle of **4** (a) and **5** (b).

**Table S1** Single crystal diffraction data and structure refinement of compounds **4** (CCDC 1020805) and compounds **5** (CCDC 1004478).

| Parameters                        | <b>4</b>                                                                                        | <b>5</b>                                                                                                 |
|-----------------------------------|-------------------------------------------------------------------------------------------------|----------------------------------------------------------------------------------------------------------|
| Empirical formula                 | C <sub>26</sub> H <sub>16</sub>                                                                 | C <sub>26</sub> H <sub>16</sub>                                                                          |
| Formula weight                    | 328.39                                                                                          | 328.39                                                                                                   |
| Temperature                       | 173.1500K                                                                                       | 296(2)K                                                                                                  |
| Wavelength                        | 0.71073                                                                                         | 0.71073                                                                                                  |
| Crystal system                    | Monoclinic                                                                                      | Monoclinic                                                                                               |
| Space group                       | C1c1                                                                                            | Cc                                                                                                       |
| Unit cell dimensions              | a=38.26(3)Å, $\alpha$ =90<br>b= 5.862(4) Å,<br>$\beta$ = 92.456(9)<br>c=7.489(6)Å, $\gamma$ =90 | a=4.8880(10)Å, $\alpha$ =90.00<br>b= 23.378(5) Å,<br>$\beta$ = 94.07(3)<br>c=15.437(3)Å, $\gamma$ =90.00 |
| Z                                 | 4                                                                                               | 4                                                                                                        |
| Density (calculated)              | 1.300 g/cm <sup>3</sup>                                                                         | 1.240 g/cm <sup>3</sup>                                                                                  |
| Absorption coefficient            | 0.074                                                                                           | 0.070                                                                                                    |
| F(000)                            | 688                                                                                             | 688                                                                                                      |
| Crystalsize(mm)                   | 0.45×0.43×0.03                                                                                  | 0.38×0.21×0.07                                                                                           |
| Thetarange for data collection    | 1.0655° to 27.4694°                                                                             | 1.3224° to 27.4696°                                                                                      |
| Indexranges                       | -49<=h<=49<br>-7<=k<=7<br>-9<=l<=9                                                              | -6<=h<=6<br>-30<=k<=30<br>-19<=l<=18                                                                     |
| Reflections collected             | 6239                                                                                            | 9745                                                                                                     |
| Independent reflections           | 3537                                                                                            | 2013                                                                                                     |
| R <sub>int</sub>                  | 0.0352                                                                                          | 0.0601                                                                                                   |
| Completeness to theta             | 98.9%                                                                                           | 99.3%                                                                                                    |
| Absorption correction             | multi-scan                                                                                      | multi-scan                                                                                               |
| Max. and min. transmission        | 1.0000 and 0.6993                                                                               | 1.0000 and 0.5409                                                                                        |
| Data/ restraints / parameters     | 3537/2/235                                                                                      | 2013/2/235                                                                                               |
| Goodness-of-fit on F <sup>2</sup> | 1.120                                                                                           | 1.276                                                                                                    |
| FinalR indices [I>2sigma(I)]      | R <sub>1</sub> = 0.0648                                                                         | R <sub>1</sub> = 0.0748                                                                                  |
| R indices (all data)              | wR <sub>2</sub> = 0.1608<br>R <sub>1</sub> = 0.0592,<br>wR <sub>2</sub> = 0.1757                | wR <sub>2</sub> = 0.1599<br>R <sub>1</sub> = 0.0667,<br>wR <sub>2</sub> = 0.1555                         |
| Largest diff. peak and hole       | 0.288 and -0.202e.Å <sup>-3</sup>                                                               | 0.138 and -0.100e.Å <sup>-3</sup>                                                                        |

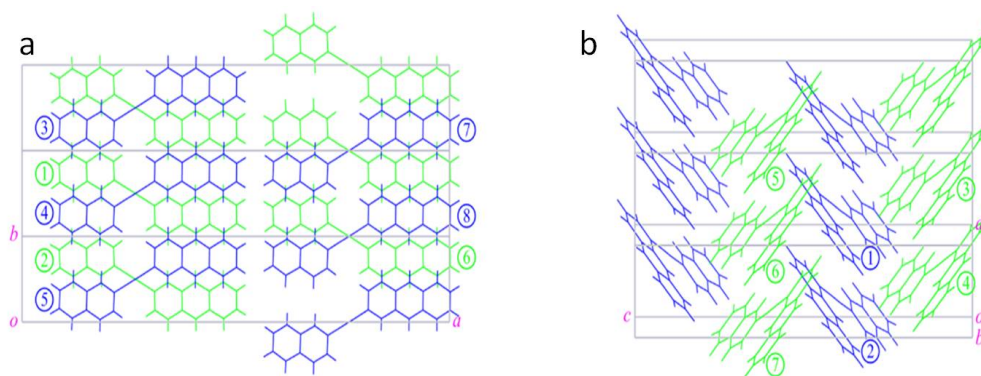

**Fig. S4** Crystal structures of compounds **4** (a) and **5** (b) and illustrations for the nearest neighbouring molecular pairs considered in the transfer integral calculation.

**Table S2** Hole and electron transfer integrals for the molecular pairs taken from compounds **4** and **5**.

|          |          | holes (meV) | electrons (meV) |
|----------|----------|-------------|-----------------|
| <b>4</b> | $t_{12}$ | 57.733      | 65.911          |
|          | $t_{13}$ | 5.076       | 5.694           |
|          | $t_{14}$ | 99.835      | 78.646          |
|          | $t_{15}$ | 54.733      | 48.737          |
|          | $t_{16}$ | 0.833       | 2.529           |
|          | $t_{17}$ | 0.853       | 0.352           |
|          | $t_{18}$ | 0.645       | 0.744           |
| <b>5</b> | $t_{12}$ | 42.604      | 9.433           |
|          | $t_{13}$ | 7.563       | 2.207           |
|          | $t_{14}$ | 2.974       | 1.588           |
|          | $t_{15}$ | 2.937       | 1.751           |
|          | $t_{16}$ | 0.651       | 8.603           |
|          | $t_{17}$ | 5.241       | 10.439          |

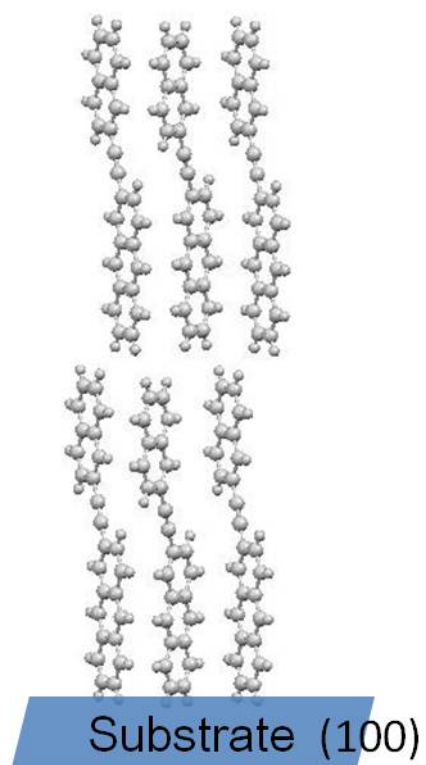

**Fig. S5** The molecules of compound **4** were perpendicular to the substrate.

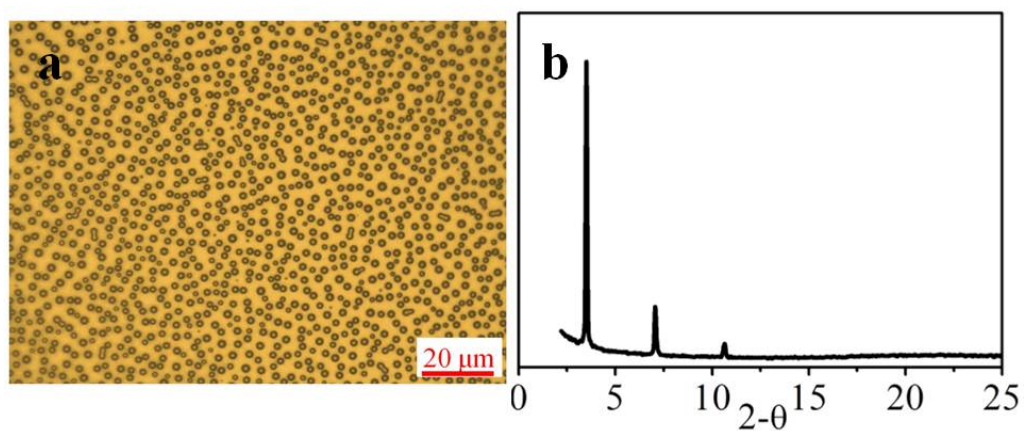

**Fig. S6** (a) optical images of thin film of **5** on OTS treated Si/SiO<sub>2</sub> substrate; (b) thin film XRD analysis of compound **5**.

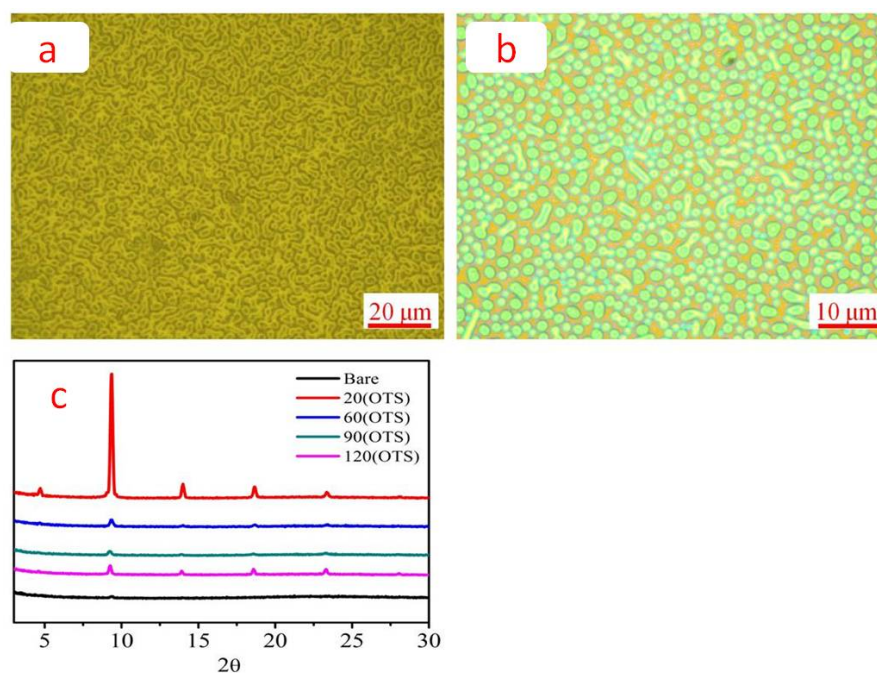

**Fig. S7** Optical images of thin film of **4** and **5** on bare Si/SiO<sub>2</sub> substrate, and thin film XRD analysis of compound **4** at different conditions. (a) thin film of **4** on bare Si/SiO<sub>2</sub> substrate; (b) thin film of **5** on bare Si/SiO<sub>2</sub> substrate; (c) thin film XRD analysis of compound **4**.

### $^1\text{H}$ NMR of Compound 4

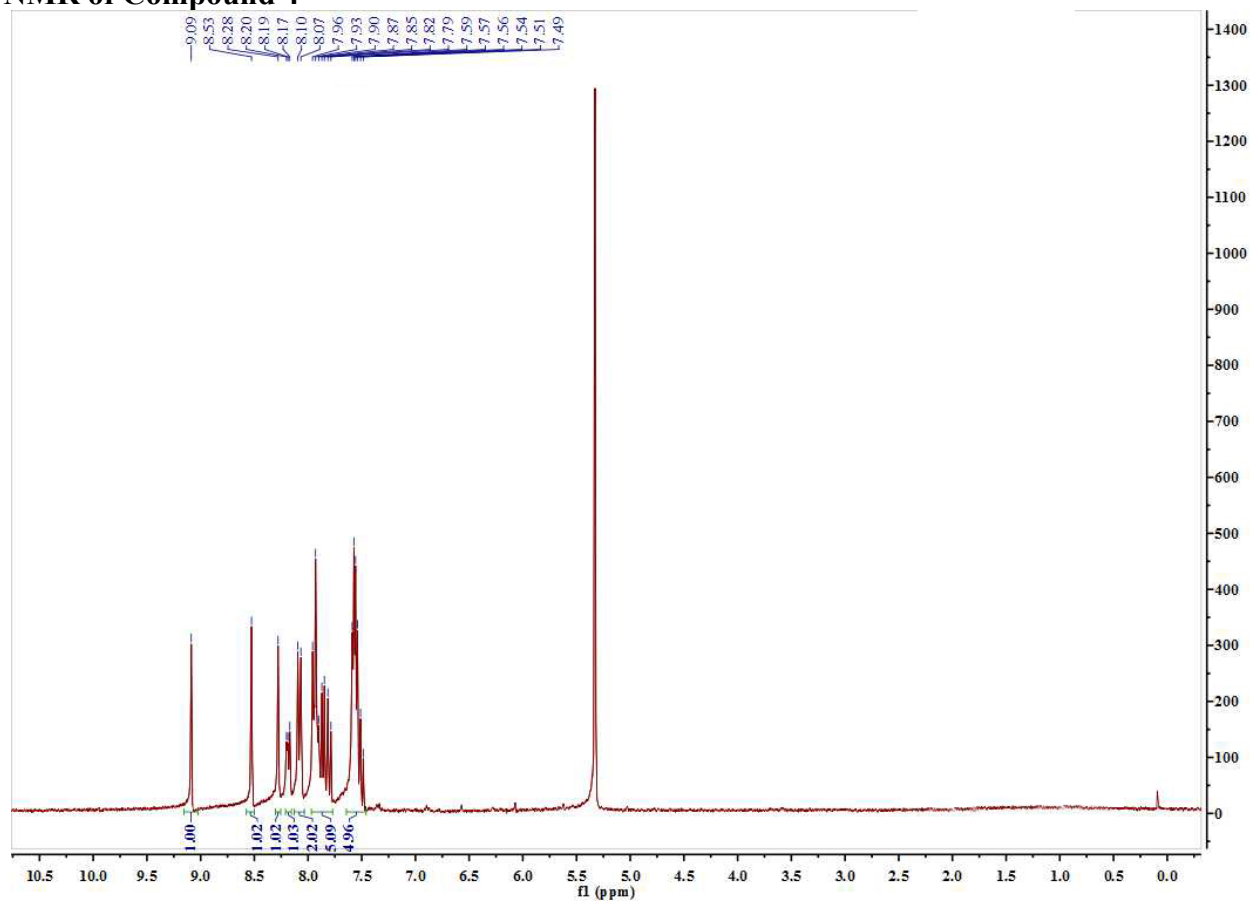

### $^1\text{H}$ NMR of Compound 5

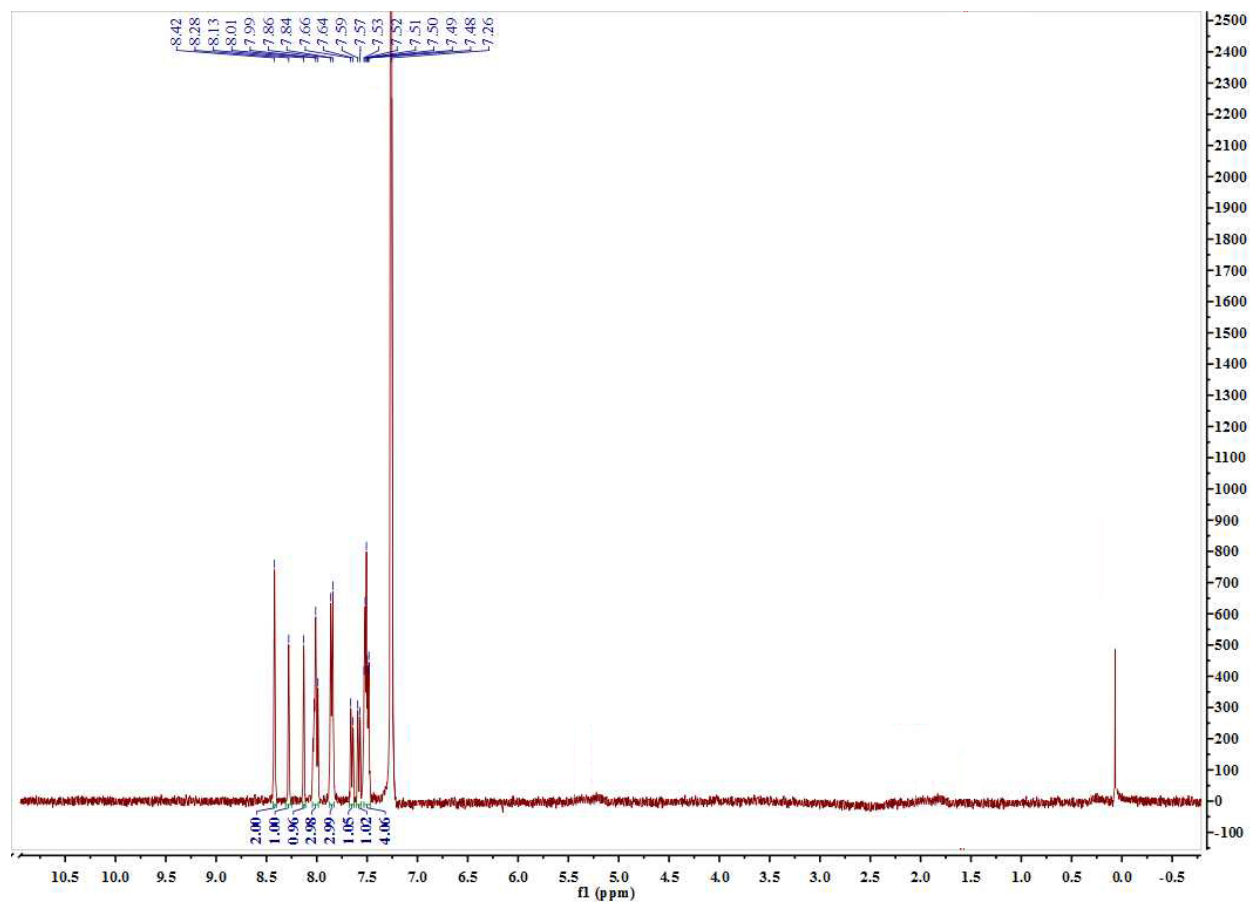

Supplement: c5tc00606f1.pdf [file c5tc00606f1.pdf]
